# Supplementary material for: Ab initio study of changing the oxygen reduction activity of Co–Fe-based perovskites by tuning the B-site composition
Source: Royal Society of Chemistry journal article supplement (doi:10.1039/d2cp05324a), 2023-01-01
Supplement: d2cp05324a1.pdf [file d2cp05324a1.pdf]

## Supplementary information

### ***Ab initio* study of changing the oxygen reduction activity of Co - Fe-based perovskites by tuning the B-site composition**

Ismail A. M. Ibrahim<sup>a,b</sup> and Chan-Yeup Chung<sup>a</sup>

<sup>a</sup>Division of Carbon Neutrality & Materials Digitalization, Korea Institute of Ceramic Engineering & Technology, Jinju 52851, South Korea.

<sup>b</sup>Department of Chemistry, Faculty of Science, Helwan University, 11795 Cairo, Egypt.

E-mail:

ibrahim@kicet.re.kr, ismail.ibrahim@science.helwan.edu.eg (Ismail Ibrahim)

chanyeup@kicet.re.kr (Chan-Yeup Chung)

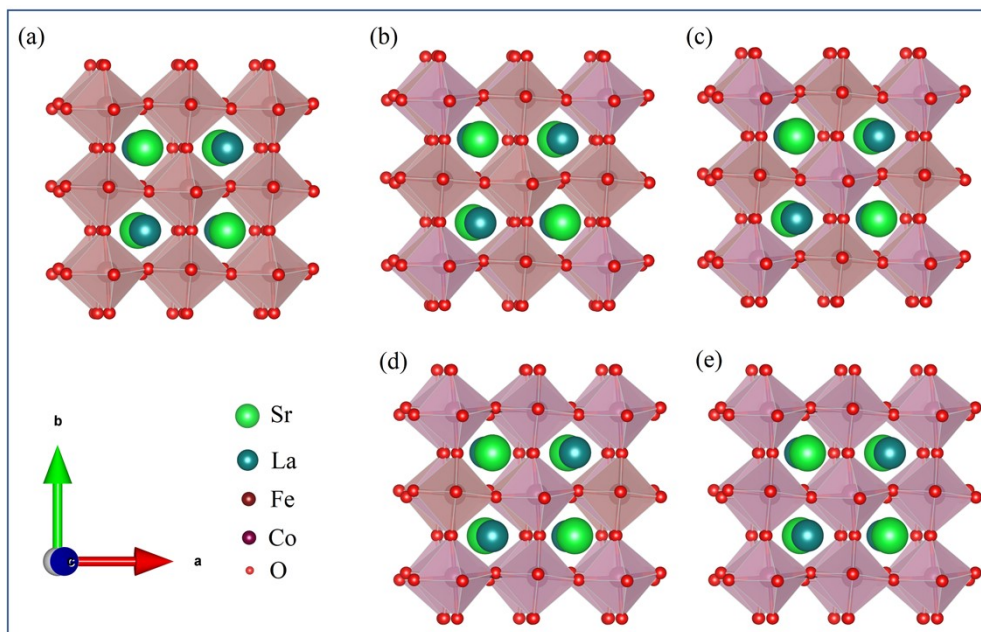

**Figure S1:** Optimized bulk structures of (a) LSF, (b) LSCF25, (c) LSCF50, (d) LSCF75, and (e) LSC.

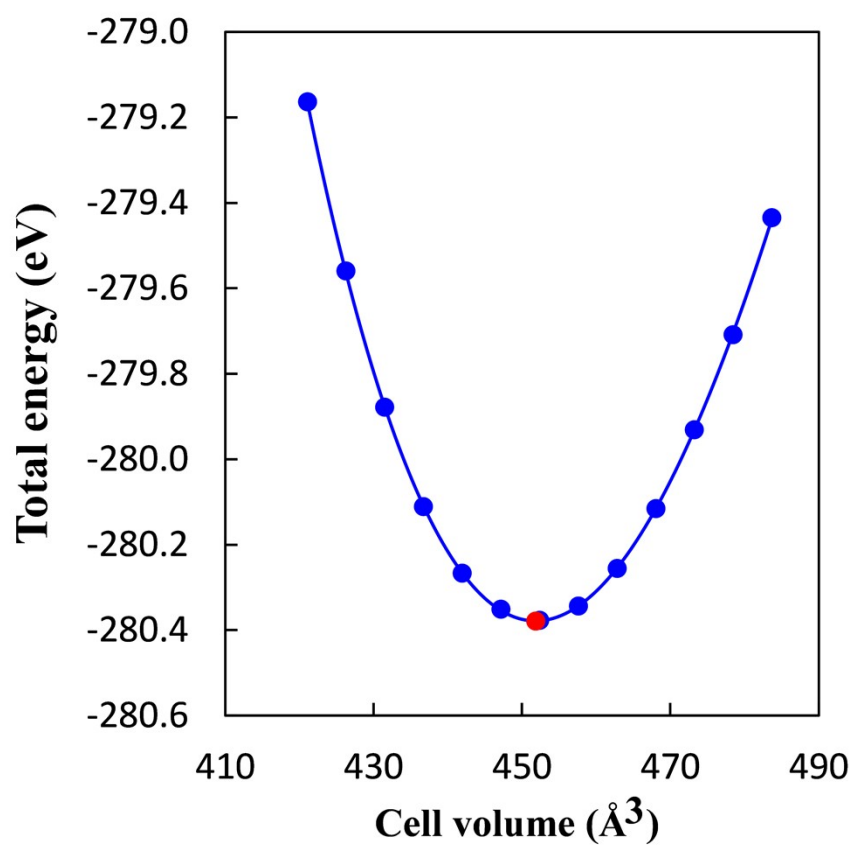

**Figure S2:** Total energy–Volume curve of LSC. The red ball represents the equilibrium volume obtained by the third-order Birch-Murnaghan equation of states.

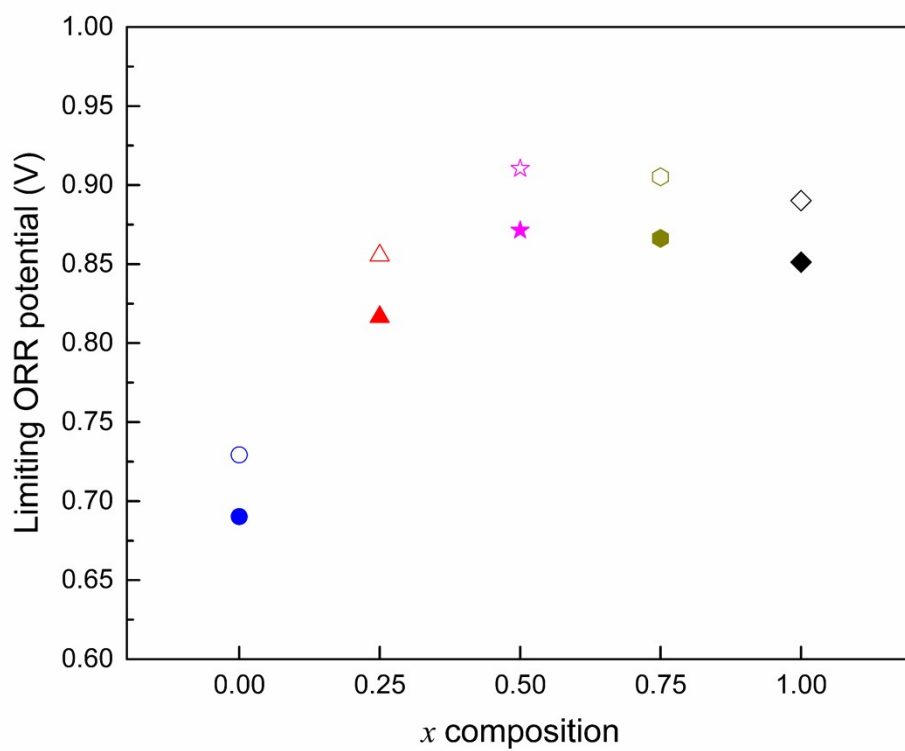

**Figure S3:** The limiting ORR potential as a function of the Co/Fe composition. The limiting potentials without<sup>23</sup> and with<sup>45</sup> including entropy corrections for the adsorbates are shown as full and empty symbols, respectively.

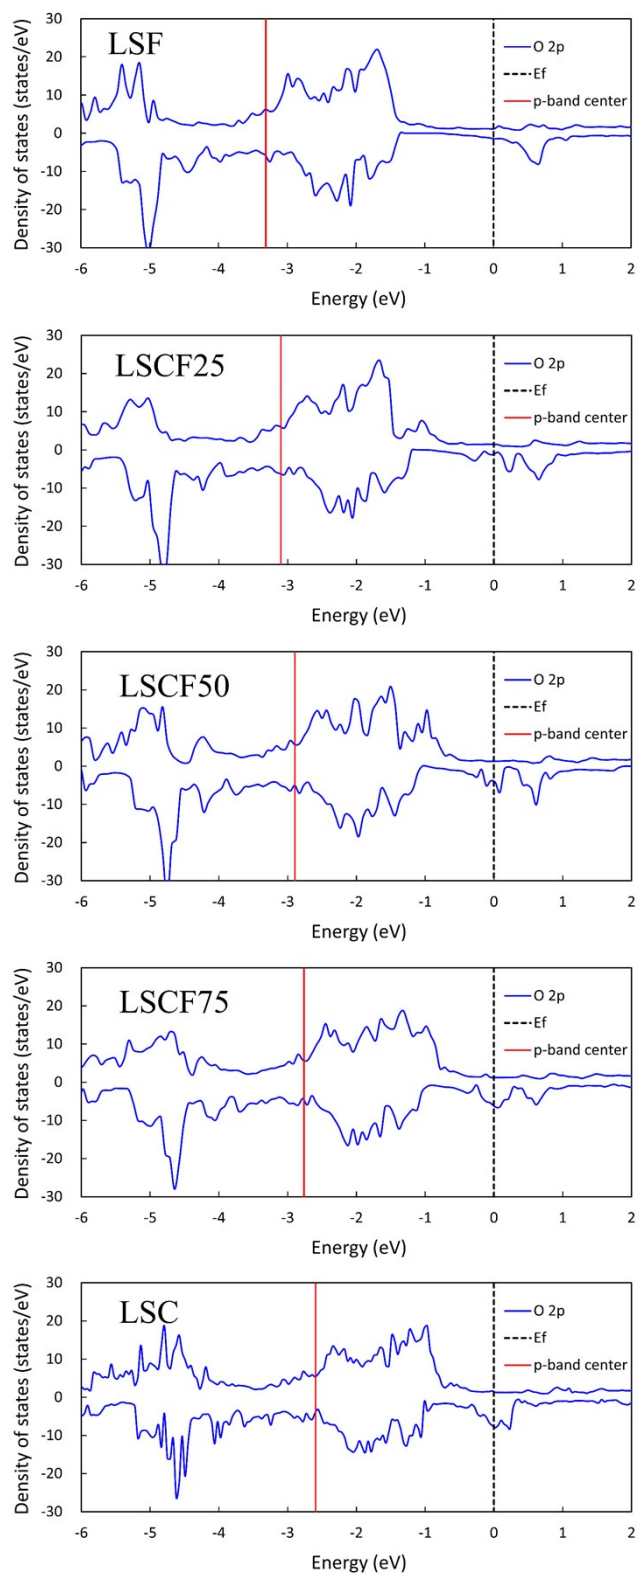

**Figure S4:** Partial density of states of bulk  $\text{La}_{0.5}\text{Sr}_{0.5}\text{Co}_x\text{Fe}_{1-x}\text{O}_3$  structures. Fermi level ( $E_f$ ) is set at 0 eV.

**Table S1:** The optimized lattice constant ( $a$ ) of  $\text{La}_{0.5}\text{Sr}_{0.5}\text{Co}_x\text{Fe}_{1-x}\text{O}_3$  perovskite supercells.

| Perovskite | Lattice constant<br>$a$ (Å) |
|------------|-----------------------------|
| LSF        | 7.723                       |
| LSCF25     | 7.720                       |
| LSCF50     | 7.689                       |
| LSCF75     | 7.683                       |
| LSC        | 7.674                       |

**Table S2:** Zero-point energy (ZPE) and entropy contribution (TS) of the gas phase and adsorbed species at  $T = 298$  K. The entropy corrections for the adsorbates on the perovskite surface were considered as zero.<sup>23</sup>

| Species              | ZPE (eV) | TS (eV) |
|----------------------|----------|---------|
| $\text{H}_2$         | 0.27     | 0.41    |
| $\text{O}_2$         | 0.10     | 0.64    |
| $\text{H}_2\text{O}$ | 0.57     | 0.67    |
| $\text{O}^*$         | 0.07     |         |
| $\text{OO}^*$        | 0.14     |         |
| $\text{HO}^*$        | 0.35     |         |
| $\text{HOO}^*$       | 0.43     |         |
